# Supplementary material for: Systematic analyses reveal uniqueness and origin of the CFEM domain in fungi
Source: PubMed Central journal article supplement (PMC4530338; doi:10.1038/srep13032), 2015-08-10
Supplement: srep13032-s1.pdf [file srep13032-s1.pdf]

# Supporting Information

## **Systematic analyses reveal uniqueness and origin of the CFEM domain in fungi**

Zhen-Na Zhang<sup>1,2,†</sup>, Qin-Yi Wu<sup>1,†</sup>, Gui-Zhi Zhang<sup>2</sup>, Yue-Yan Zhu<sup>1</sup>, Robert W. Murphy<sup>3</sup>, Zhen Liu<sup>3,\*</sup> and Cheng-Gang Zou<sup>1,\*</sup>

<sup>1</sup>Laboratory for Conservation and Utilization of Bio-Resources, Yunnan University, Kunming, China

<sup>2</sup>Xiamen Tobacco Industrial CO., LTD, Xiamen, China

<sup>3</sup>State Key Laboratory of Genetic Resources and Evolution, Kunming Institute of Zoology, Chinese Academy of Sciences, Kunming, China

Table S1. Fungal species used in this study.

| Species                            | Phylum     | Genome source |
|------------------------------------|------------|---------------|
| <i>Ajellomyces capsulata</i>       | Ascomycota | BROAD-FGI     |
| <i>Ajellomyces dermatitidis</i>    | Ascomycota | BROAD-FGI     |
| <i>Arthrobotrys oligospora</i>     | Ascomycota | NCBI          |
| <i>Arthroderma benhamiae</i>       | Ascomycota | BROAD-FGI     |
| <i>Arthroderma gypseum</i>         | Ascomycota | NCBI          |
| <i>Ascospaera apis</i>             | Ascomycota | NCBI          |
| <i>Aspergillus carbonarius</i>     | Ascomycota | BROAD-FGI     |
| <i>Aspergillus clavatus</i>        | Ascomycota | BROAD-FGI     |
| <i>Aspergillus flavus</i>          | Ascomycota | BROAD-FGI     |
| <i>Asperigillus fumigates</i>      | Ascomycota | BROAD-FGI     |
| <i>Asperigillus nidulans</i>       | Ascomycota | BROAD-FGI     |
| <i>Asperigillus niger</i>          | Ascomycota | BROAD-FGI     |
| <i>Aspergillus oryzae</i>          | Ascomycota | BROAD-FGI     |
| <i>Aspergillus terreus</i>         | Ascomycota | BROAD-FGI     |
| <i>Botryotinia fuckeliana</i>      | Ascomycota | BROAD-FGI     |
| <i>Candida albicans</i>            | Ascomycota | BROAD-FGI     |
| <i>Candida dubliniensis</i>        | Ascomycota | NCBI          |
| <i>Candida glabrata</i>            | Ascomycota | NCBI          |
| <i>Candida parapsilosis</i>        | Ascomycota | BROAD-FGI     |
| <i>Candida tropicalis</i>          | Ascomycota | BROAD-FGI     |
| <i>Chaetomium globosum</i>         | Ascomycota | BROAD-FGI     |
| <i>Clavispora lusitaniae</i>       | Ascomycota | NCBI          |
| <i>Coccidioides immitis</i>        | Ascomycota | BROAD-FGI     |
| <i>Coccidioides posadasii</i>      | Ascomycota | BROAD-FGI     |
| <i>Cochliobolus heterostrophus</i> | Ascomycota | JGI           |
| <i>Debaryomyces hansenii</i>       | Ascomycota | BROAD-FGI     |

|                                      |            |           |
|--------------------------------------|------------|-----------|
| <i>Eremothecium gossypii</i>         | Ascomycota | NCBI      |
| <i>Fusarium oxysporum</i>            | Ascomycota | BROAD-FGI |
| <i>Gibberella moniliformis</i>       | Ascomycota | NCBI      |
| <i>Gibberella zeae</i>               | Ascomycota | NCBI      |
| <i>Glomerella graminicola</i>        | Ascomycota | NCBI      |
| <i>Hypocrea jecorina</i>             | Ascomycota | NCBI      |
| <i>Hypocrea virens</i>               | Ascomycota | NCBI      |
| <i>Kluyveromyces lactis</i>          | Ascomycota | BROAD-FGI |
| <i>Lachancea kluyveri</i>            | Ascomycota | NCBI      |
| <i>Lachancea thermotolerans</i>      | Ascomycota | NCBI      |
| <i>Lachancea waltii</i>              | Ascomycota | RFCG      |
| <i>Lodderomyces elongisporus</i>     | Ascomycota | BROAD-FGI |
| <i>Magnaporthe grisea</i>            | Ascomycota | BROAD-FGI |
| <i>Nectria haematococca</i>          | Ascomycota | JGI       |
| <i>Neosartorya fischeri</i>          | Ascomycota | NCBI      |
| <i>Neurospora crassa</i>             | Ascomycota | BROAD-FGI |
| <i>Paracoccidioides brasiliensis</i> | Ascomycota | NCBI      |
| <i>Penicillium chrysogenum</i>       | Ascomycota | NCBI      |
| <i>Penicillium marneffeii</i>        | Ascomycota | NCBI      |
| <i>Phaeosphaeria nodorum</i>         | Ascomycota | NCBI      |
| <i>Pichia pastoris</i>               | Ascomycota | NCBI      |
| <i>Pichia guilliermondii</i>         | Ascomycota | NCBI      |
| <i>Pneumocystis carinii</i>          | Ascomycota | NCBI      |
| <i>Podospora anserina</i>            | Ascomycota | NCBI      |
| <i>Pyrenophora tritici-repentis</i>  | Ascomycota | BROAD-FGI |
| <i>Saccharomyces bayanus</i>         | Ascomycota | NCBI      |
| <i>Saccharomyces cerevisiae</i>      | Ascomycota | NCBI      |
| <i>Saccharomyces kluyveri</i>        | Ascomycota | RFCG      |
| <i>Saccharomyces kudriavzevii</i>    | Ascomycota | RFCG      |

|                                                          |               |           |
|----------------------------------------------------------|---------------|-----------|
| <i>Saccharomyces mikatae</i>                             | Ascomycota    | RFCG      |
| <i>Saccharomyces paradoxus</i>                           | Ascomycota    | RFCG      |
| <i>Scheffersomyces stipitis</i>                          | Ascomycota    | NCBI      |
| <i>Schizosaccharomyces cryophilus</i>                    | Ascomycota    | NCBI      |
| <i>Schizosaccharomyces japonicas</i>                     | Ascomycota    | BROAD-FGI |
| <i>Schizosaccharomyces octoporus</i>                     | Ascomycota    | FGR       |
| <i>Schizosaccharomyces pombe</i>                         | Ascomycota    | BROAD-FGI |
| <i>Sclerotinia sclerotiorum</i>                          | Ascomycota    | BROAD-FGI |
| <i>Talaromyces stipitatus</i>                            | Ascomycota    | NCBI      |
| <i>Trichoderma atroviride</i>                            | Ascomycota    | JGI       |
| <i>Trichophyton equinum</i>                              | Ascomycota    | NCBI      |
| <i>Trichophyton rubrum</i>                               | Ascomycota    | NCBI      |
| <i>Trichophyton tonsurans</i>                            | Ascomycota    | NCBI      |
| <i>Trichophyton verrucosum</i>                           | Ascomycota    | NCBI      |
| <i>Uncinocarpus reesii</i>                               | Ascomycota    | BROAD-FGI |
| <i>Vanderwaltozyma polyspora</i>                         | Ascomycota    | NCBI      |
| <i>Verticillium albo-atrum</i>                           | Ascomycota    | BROAD-FGI |
| <i>Verticillium dahlia</i>                               | Ascomycota    | BROAD-FGI |
| <i>Yarrowia lipolytica</i>                               | Ascomycota    | NCBI      |
| <i>Zygosaccharomyces rouxii</i>                          | Ascomycota    | NCBI      |
| <i>Corpinus cinereus</i>                                 | Basidiomycota | BROAD-FGI |
| <i>Cryptococcus gattii</i>                               | Basidiomycota | RFCG      |
| <i>Cryptococcus neoformans</i> var.<br><i>grubii</i>     | Basidiomycota | BROAD-FGI |
| <i>Cryptococcus neoformans</i> var.<br><i>neoformans</i> | Basidiomycota | BROAD-FGI |
| <i>Laccaria bicolor</i>                                  | Basidiomycota | JGI       |
| <i>Malassezia globosa</i>                                | Basidiomycota | FGR       |
| <i>Malassezia restricta</i>                              | Basidiomycota | NCBI      |

|                                       |                 |           |
|---------------------------------------|-----------------|-----------|
| <i>Moniliophthora perniciosa</i>      | Basidiomycota   | NCBI      |
| <i>Phanerochaete chrysosporium</i>    | Basidiomycota   | JGI       |
| <i>Postia placenta</i>                | Basidiomycota   | JGI       |
| <i>Puccinia graminis</i>              | Basidiomycota   | BROAD-FGI |
| <i>Puccinia triticina</i>             | Basidiomycota   | NCBI      |
| <i>Schizophyllum commune</i>          | Basidiomycota   | NCBI      |
| <i>Ustilago maydis</i>                | Basidiomycota   | BROAD-FGI |
| <i>Phycomyces blakesleeanus</i>       | Zygomycota      | NCBI      |
| <i>Rhizopus oryzae</i>                | Zygomycota      | NCBI      |
| <i>Batrachochytrium dendrobatidis</i> | Chytridiomycota | NCBI      |
| <i>Spizellomyces punctatus</i>        | Chytridiomycota | NCBI      |
| <i>Encephalitozoon cuniculi</i>       | Microsporidia   | NCBI      |
| <i>Encephalitozoon intestinalis</i>   | Microsporidia   | NCBI      |
| <i>Enterocytozoon bieneusi</i>        | Microsporidia   | NCBI      |
| <i>Nematocida parisii</i>             | Microsporidia   | NCBI      |
| <i>Nosema ceranae</i>                 | Microsporidia   | NCBI      |
| <i>Nosema locustae</i>                | Microsporidia   | NCBI      |
| <i>Octosporea bayeri</i>              | Microsporidia   | NCBI      |

---

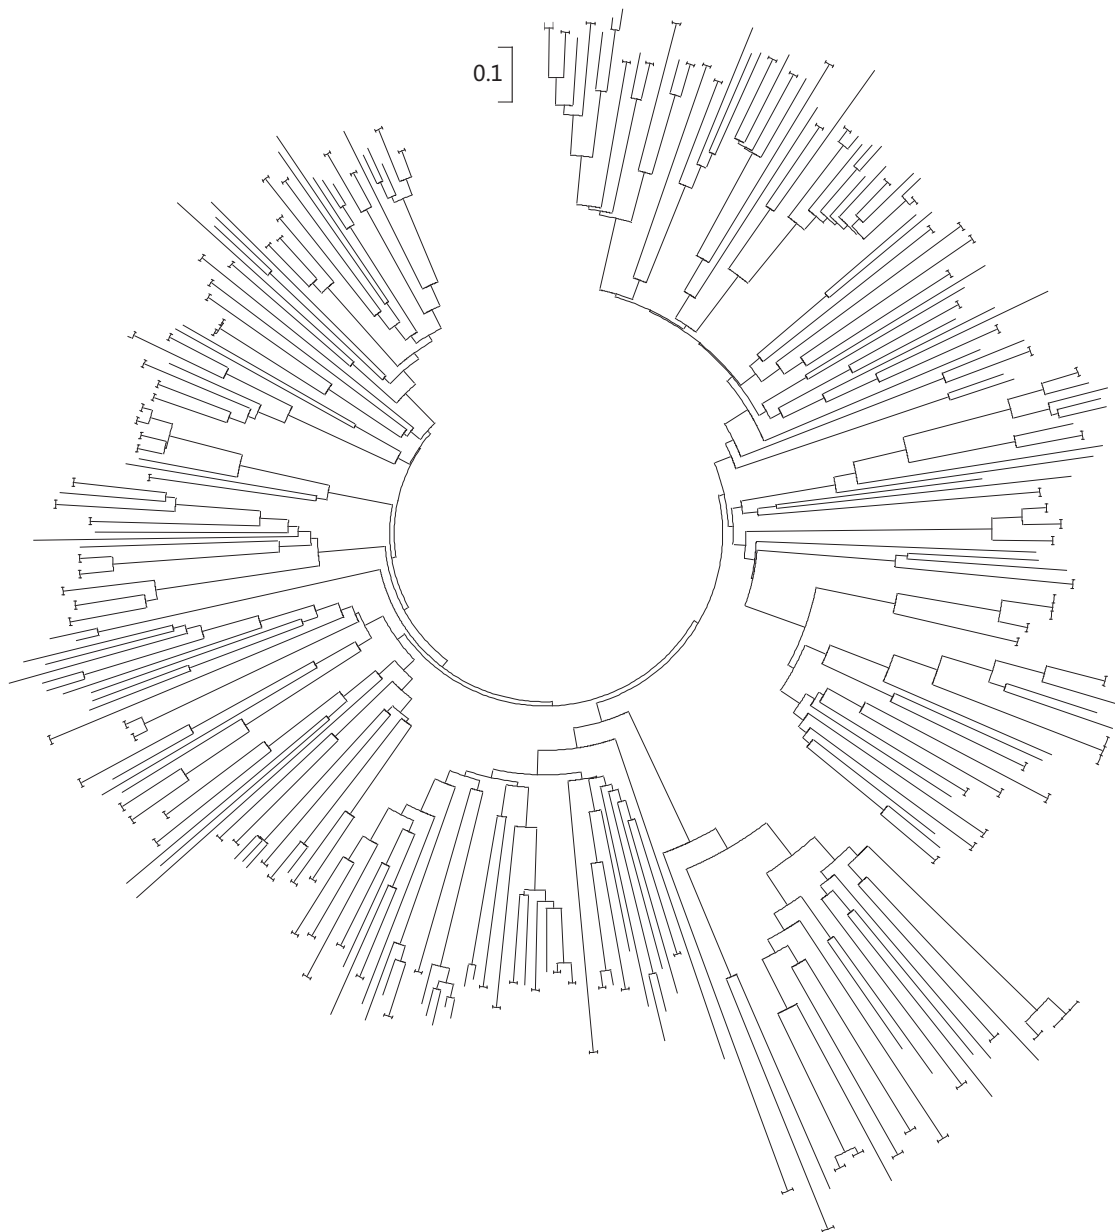

Supplementary figure 1. Neighbor-joining diagram constructed by using all CFEM sequences we identified from 64 fungal species.
